# Supplementary material for: A confinement-regulated (H3C–NH3)+ ion as a smallest dual-wheel rotator showing bisected rotation dynamics
Source: Royal Society of Chemistry journal article supplement (doi:10.1039/d3cp05406c), 2023-12-19
Supplement: d3cp05406c1.pdf [file d3cp05406c1.pdf]

## Electronic Supplementary Information

for

### A confinement-regulated (H<sub>3</sub>C–NH<sub>3</sub>)<sup>+</sup> ion as a smallest dual-wheel rotator showing bisected rotation dynamics

Wang Li,<sup>a,b</sup> Miao Xie,<sup>a</sup> Shi-Yong Zhang,<sup>b</sup> Cheng-Hui Zeng,<sup>a,c</sup> Zi-Yi Du<sup>a,\*</sup> and Chun-Ting He<sup>a</sup>

<sup>a</sup>College of Chemistry and Chemical Engineering, Jiangxi Normal University, Nanchang 330022, China. E-mail: ziyidu@gmail.com

<sup>b</sup>College of Chemistry and Chemical Engineering, Gannan Normal University, Ganzhou 341000, China

<sup>c</sup>School of Chemistry, Sun Yat-Sen University, Guangzhou 510275, China

**Table S1** Summary of crystal data and structural refinements for **1** at 150 and 293 K

| Temperature (K)                                                                                   | 150(2)                                                                                        | 293(2)         |
|---------------------------------------------------------------------------------------------------|-----------------------------------------------------------------------------------------------|----------------|
| Empirical formula                                                                                 | C <sub>13</sub> H <sub>30</sub> N <sub>1</sub> O <sub>6</sub> Cl <sub>3</sub> Cu <sub>1</sub> |                |
| Formula weight                                                                                    | 466.27                                                                                        |                |
| Space group                                                                                       | P-1                                                                                           |                |
| <i>a</i> (Å)                                                                                      | 8.5399(4)                                                                                     | 8.646(1)       |
| <i>b</i> (Å)                                                                                      | 10.3775(3)                                                                                    | 10.446(2)      |
| <i>c</i> (Å)                                                                                      | 12.2132(6)                                                                                    | 12.352(2)      |
| $\alpha$ (deg)                                                                                    | 82.772(3)                                                                                     | 82.605(2)      |
| $\beta$ (deg)                                                                                     | 80.178(4)                                                                                     | 79.325(2)      |
| $\gamma$ (deg)                                                                                    | 82.737(3)                                                                                     | 82.289(2)      |
| <i>Z</i>                                                                                          | 2                                                                                             |                |
| <i>D</i> <sub>calcd</sub> / g cm <sup>-3</sup>                                                    | 1.472                                                                                         | 1.434          |
| $\mu$ / mm <sup>-1</sup>                                                                          | 1.444                                                                                         | 1.407          |
| GOF on F <sup>2</sup>                                                                             | 1.006                                                                                         | 1.028          |
| <i>R</i> <sub>1</sub> , <i>wR</i> <sub>2</sub> [ <i>I</i> > 2 $\sigma$ ( <i>I</i> )] <sup>a</sup> | 0.0659, 0.2148                                                                                | 0.0385, 0.1016 |
| <i>R</i> <sub>1</sub> , <i>wR</i> <sub>2</sub> (all data)                                         | 0.0726, 0.2176                                                                                | 0.0520, 0.1148 |

$$^a R_1 = \sum ||F_o| - |F_c|| / \sum |F_o|, wR_2 = \{ \sum w[(F_o)^2 - (F_c)^2]^2 / \sum w[(F_o)^2]^2 \}^{1/2}$$

**Table S2** Selected bond lengths (Å) for **1** at 150 and 293 K

|         |           |           |           |
|---------|-----------|-----------|-----------|
| 153 K   |           |           |           |
| Cu1–Cl2 | 2.209(2)  | Cu1–Cl1   | 2.212(2)  |
| Cu1–Cl3 | 2.302(2)  | Cu1–Cl3#1 | 2.316(2)  |
| 293 K   |           |           |           |
| Cu1–Cl2 | 2.1972(9) | Cu1–Cl1   | 2.2037(9) |
| Cu1–Cl3 | 2.306(1)  | Cu1–Cl3#1 | 2.323(1)  |

Symmetry code: #1.  $-x + 1, -y, -z + 2$ .**Table S3** The hydrogen-bond geometries (Å, °) for **2** at 150 and 293 K

|       | D–H···A     | D–H      | H···A    | D···A    | Angle    |
|-------|-------------|----------|----------|----------|----------|
| 150 K | N1–H1C···O5 | 0.900(6) | 2.05(1)  | 2.921(1) | 162.0(5) |
|       | N1–H1D···O1 | 0.900(6) | 1.874(1) | 2.720(1) | 155.8(5) |
|       | N1–H1E···O3 | 0.900(6) | 2.192(2) | 3.018(2) | 152.3(6) |
| 293 K | N1–H1C···O5 | 0.907(2) | 2.027(7) | 2.901(7) | 161.5(2) |
|       | N1–H1D···O1 | 0.904(2) | 1.959(8) | 2.819(8) | 158.6(3) |
|       | N1–H1E···O3 | 0.906(2) | 2.124(9) | 2.965(9) | 154.2(3) |

**Table S4** Fitting parameters of the Havriliak–Negami equation for **1** at a series of temperatures from 160 to 230 K

| $T$ (K) | $\tau_0$ (s)         | $\epsilon_0$ | $\epsilon_\infty$ | $\alpha$ | $\beta$ |
|---------|----------------------|--------------|-------------------|----------|---------|
| 160     | $9.7 \times 10^{-5}$ | 3.10         | 3.02              | 0.13     | 0.54    |
| 170     | $2.6 \times 10^{-5}$ | 3.11         | 3.02              | 0.24     | 0.73    |
| 180     | $9.7 \times 10^{-6}$ | 3.13         | 3.03              | 0.24     | 0.83    |
| 190     | $3.6 \times 10^{-6}$ | 3.14         | 3.05              | 0.23     | 0.93    |
| 200     | $1.4 \times 10^{-6}$ | 3.17         | 3.06              | 0.22     | 1.0     |
| 210     | $7.0 \times 10^{-7}$ | 3.20         | 3.08              | 0.21     | 1.0     |
| 220     | $4.0 \times 10^{-7}$ | 3.22         | 3.09              | 0.21     | 1.0     |
| 230     | $2.4 \times 10^{-7}$ | 3.23         | 3.10              | 0.21     | 1.0     |

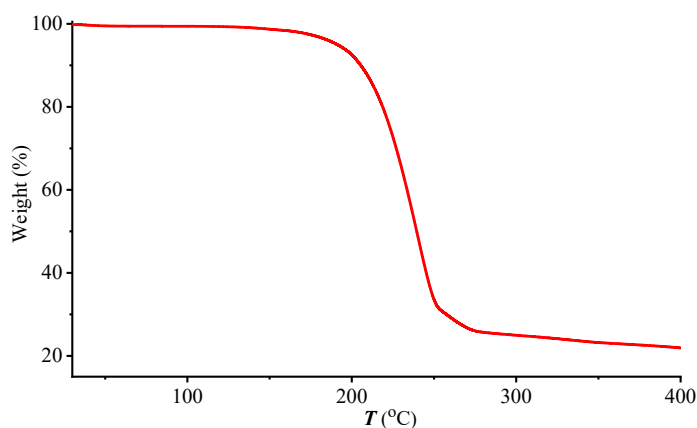**Fig. S1** Thermogravimetric curve for **1**.

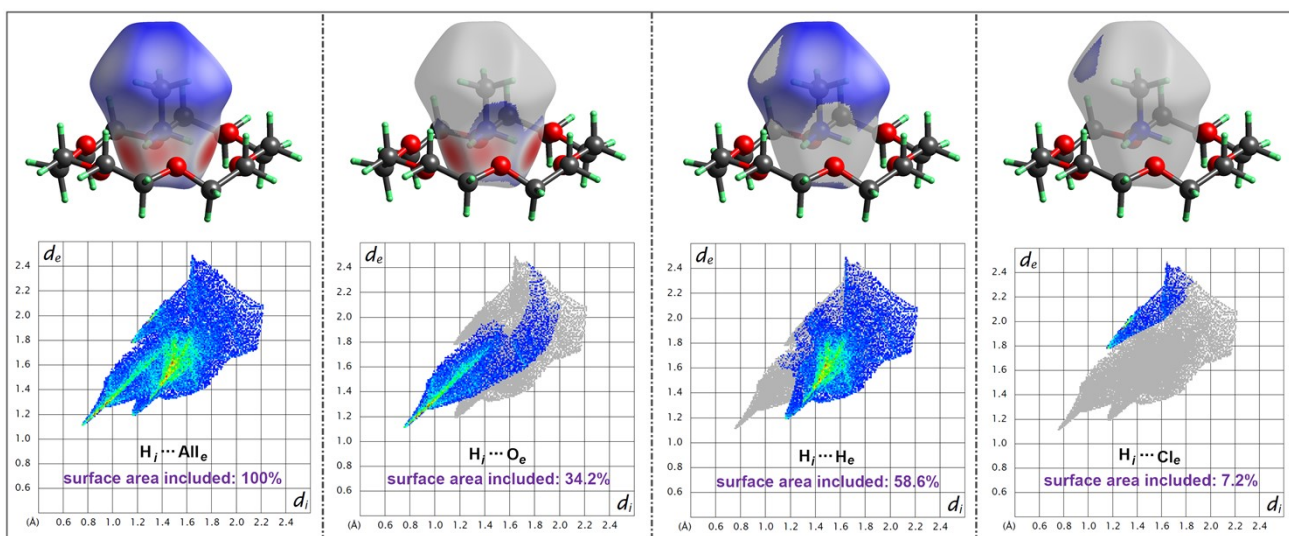

**Fig. S2** Above: Views of the Hirshfeld surface (mapped with  $d_{\text{norm}}$ ) of one  $(\text{CH}_3\text{NH}_3)^+$  ion in **1** at 293 K, indicating the relative strength of the intermolecular interactions surrounding the  $(\text{CH}_3\text{NH}_3)^+$  ion. The red, white, and blue regions represent molecular contacts shorter than, equal to, and longer than the van der Waals distance, respectively. Below: 2D fingerprint plots showing atomic contacts to the Hirshfeld surface of one  $(\text{CH}_3\text{NH}_3)^+$  ion in **1** at 293 K, where  $d_i$  and  $d_e$  denote the distances from the surface to the nearest atom interior and exterior to the surface, respectively. The 2D plots were created by binning  $(d_e, d_i)$  pairs and coloring each bin of the resulting 2D histogram as a function of the fraction of surface points in that bin, ranging from blue (few points) through green to red (many points).

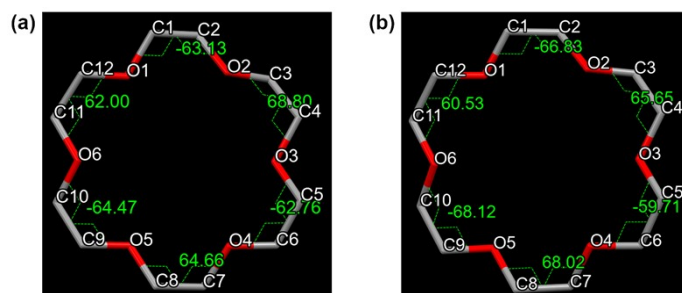

**Fig. S3** Comparison of the conformations of the O1-containing 18-crown-6 molecule in **1** at 150 K (a) and 293 K (b), respectively, with slight change of their torsions.

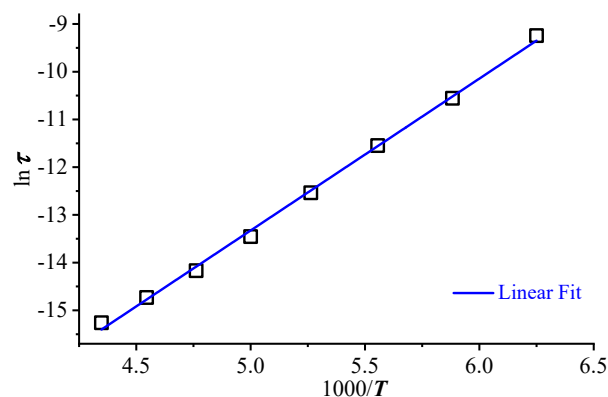

**Fig. S4** Arrhenius plots of the relaxation time  $\tau$  as a function of inverse temperature for **1**.

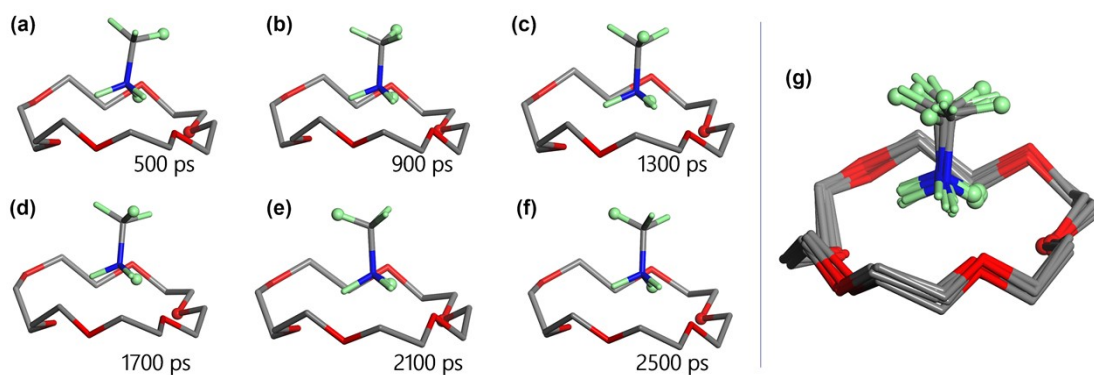

**Fig. S5** Snapshots of NVT dynamic simulation for the  $[(\text{CH}_3\text{NH}_3)(18\text{-crown-6})]^+$  complex in **1** at  $T_s$  of 150 K (a-f), and the overlapping maps of these snapshots (g), to display their dynamics. The specified H and O atoms are highlighted by balls to guide the eye.

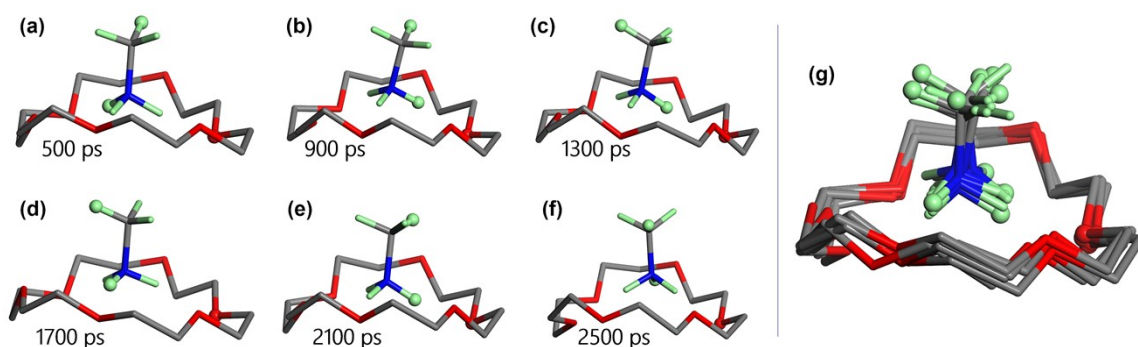

**Fig. S6** Snapshots of NVT dynamic simulation for the  $[(\text{CH}_3\text{NH}_3)(18\text{-crown-6})]^+$  complex in **1** at  $T_s$  of 330 K (a-f), and the overlapping maps of these snapshots (g), to display their dynamics. The specified H and O atoms are highlighted by balls to guide the eye.

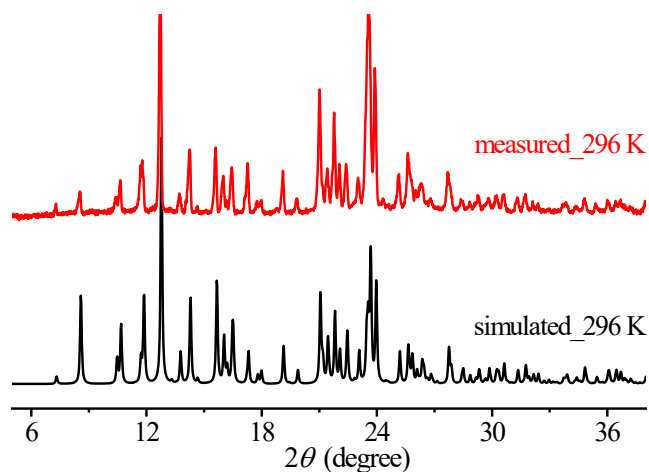

**Fig. S7** Simulated and experimental PXRD patterns for **1** at room temperature.
